# Supplementary material
Source: PubMed Central journal article supplement (PMC4017237)
Supplement: NIHMS572236-supplement-1.pdf [file NIHMS572236-supplement-1.pdf]

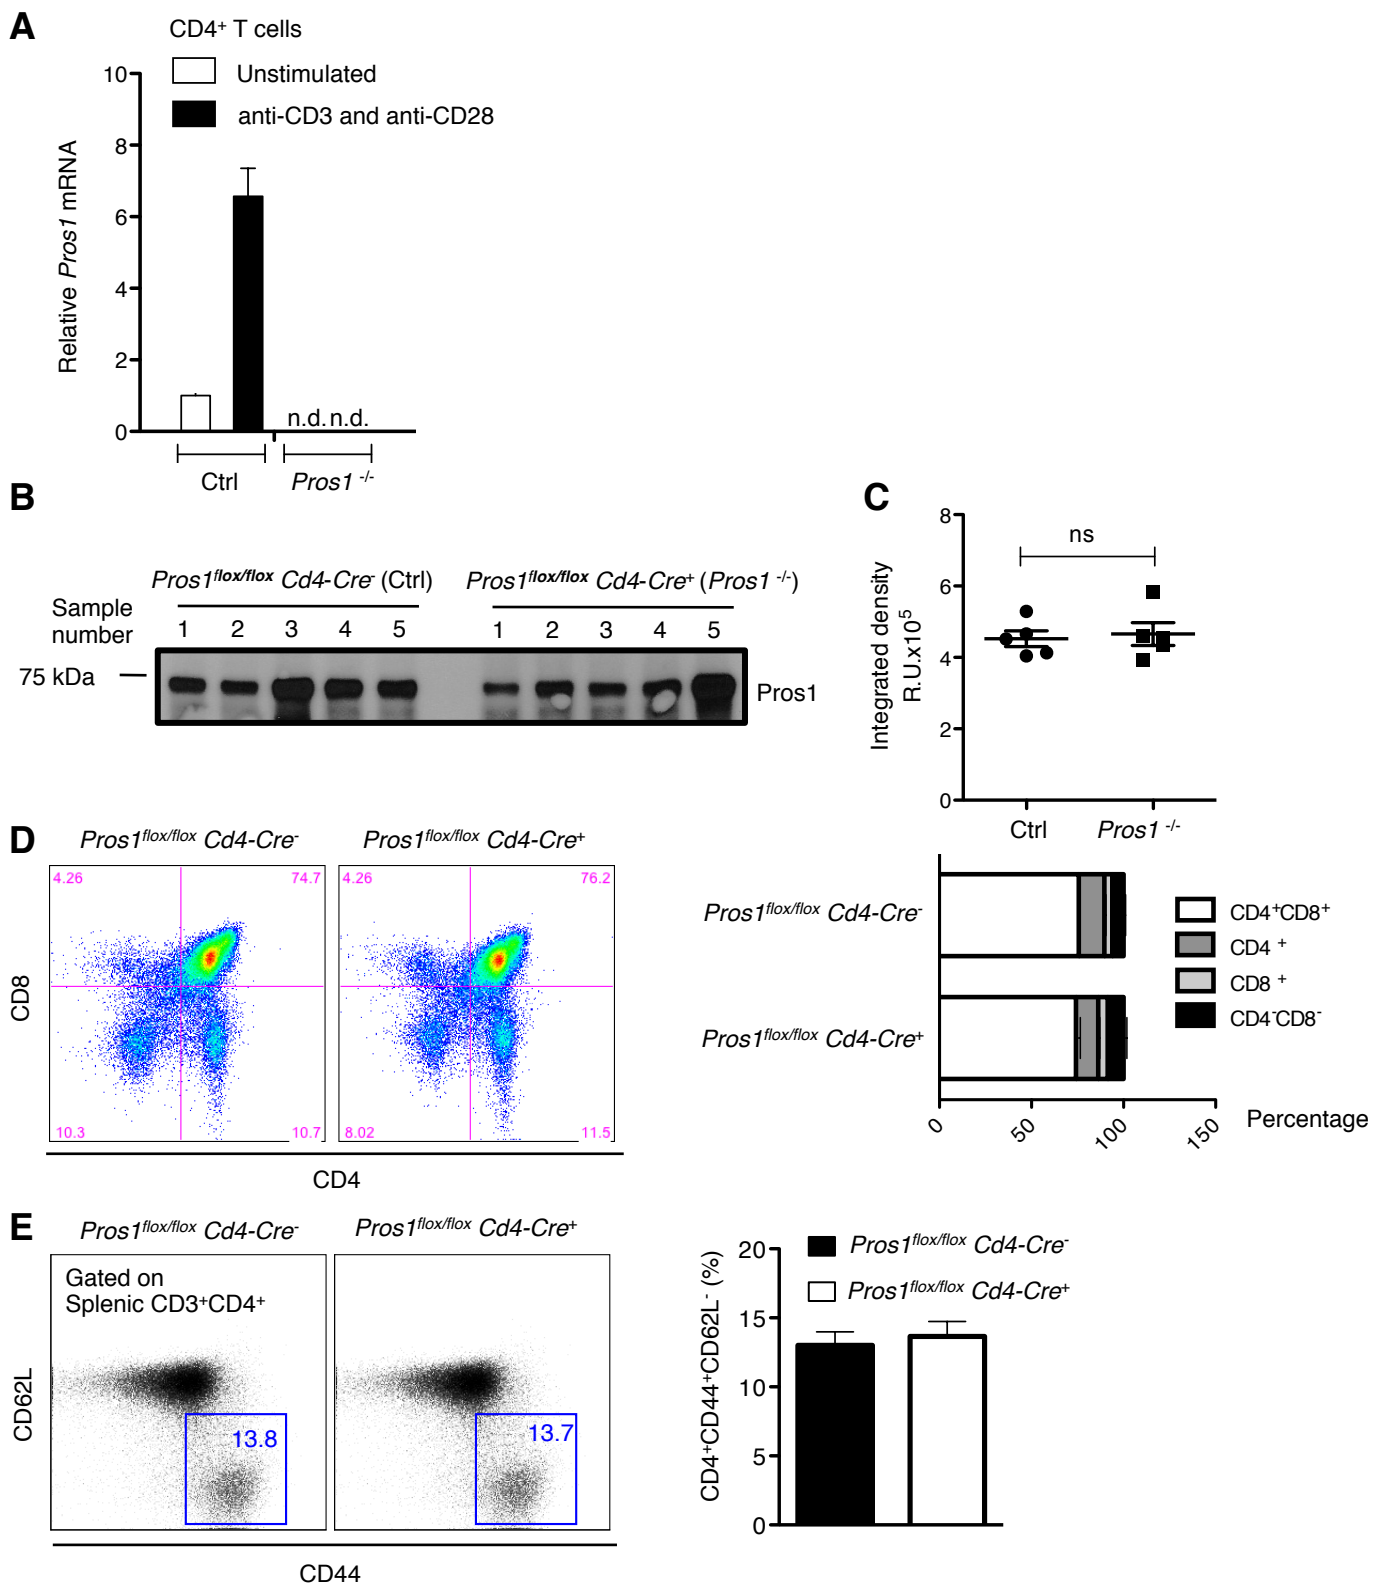

**Figure S1, related to Figure 1. *Pros1*<sup>flox/flox</sup>*Cd4-Cre*<sup>+</sup> mice lack *Pros1* expression in T cell, have normal levels of *Pros1* in plasma and show normal thymic T cell development and splenic effector memory compartment. (A) *Pros1*<sup>flox/flox</sup> *Cd4-Cre*<sup>-</sup> (Ctrl) or *Pros1*<sup>flox/flox</sup> *Cd4-Cre*<sup>+</sup> (*Pros1*<sup>-/-</sup>) splenic CD4<sup>+</sup> T cells were stimulated *in vitro* with anti-CD3 and anti-CD28 for 4 h. *Pros1* mRNA level was measured by qPCR and normalized to unstimulated Ctrl cells. n.d.: non detected. (B) Western Blot analyses of *Pros1* expression in the plasma of Ctrl and *Pros1*<sup>-/-</sup> mice.  $\gamma$ -carboxy glutamic acid (GLA) containing proteins in the plasma were immunoprecipitated and analyzed by immunoblotting with *Pros1* antibody. (C) Integrated density for each band in B, measured using ImageJ software (NIH). R.U.: relative units, n.s.: not significant. (D) Thymocytes from 2 month old *Pros1*<sup>flox/flox</sup>*Cd4-Cre*<sup>-</sup> or *Cre*<sup>+</sup> were isolated and the proportions of double positive, single positive or double negative CD4, CD8 T cells were analyzed. Representative plots (left) and independent data (right) are shown. (E) The effector/memory CD4 compartment in the indicated mice was analyzed. Representative CD62L CD44 plots (left) and independent data (right) are shown. Data are presented as individual samples or mean  $\pm$  SEM and are representative of 2 experiments with at least 3 independent samples per group**
