# Supplementary material
Source: PubMed Central journal article supplement (PMC4017237)
Supplement: NIHMS572236-supplement-2.pdf [file NIHMS572236-supplement-2.pdf]

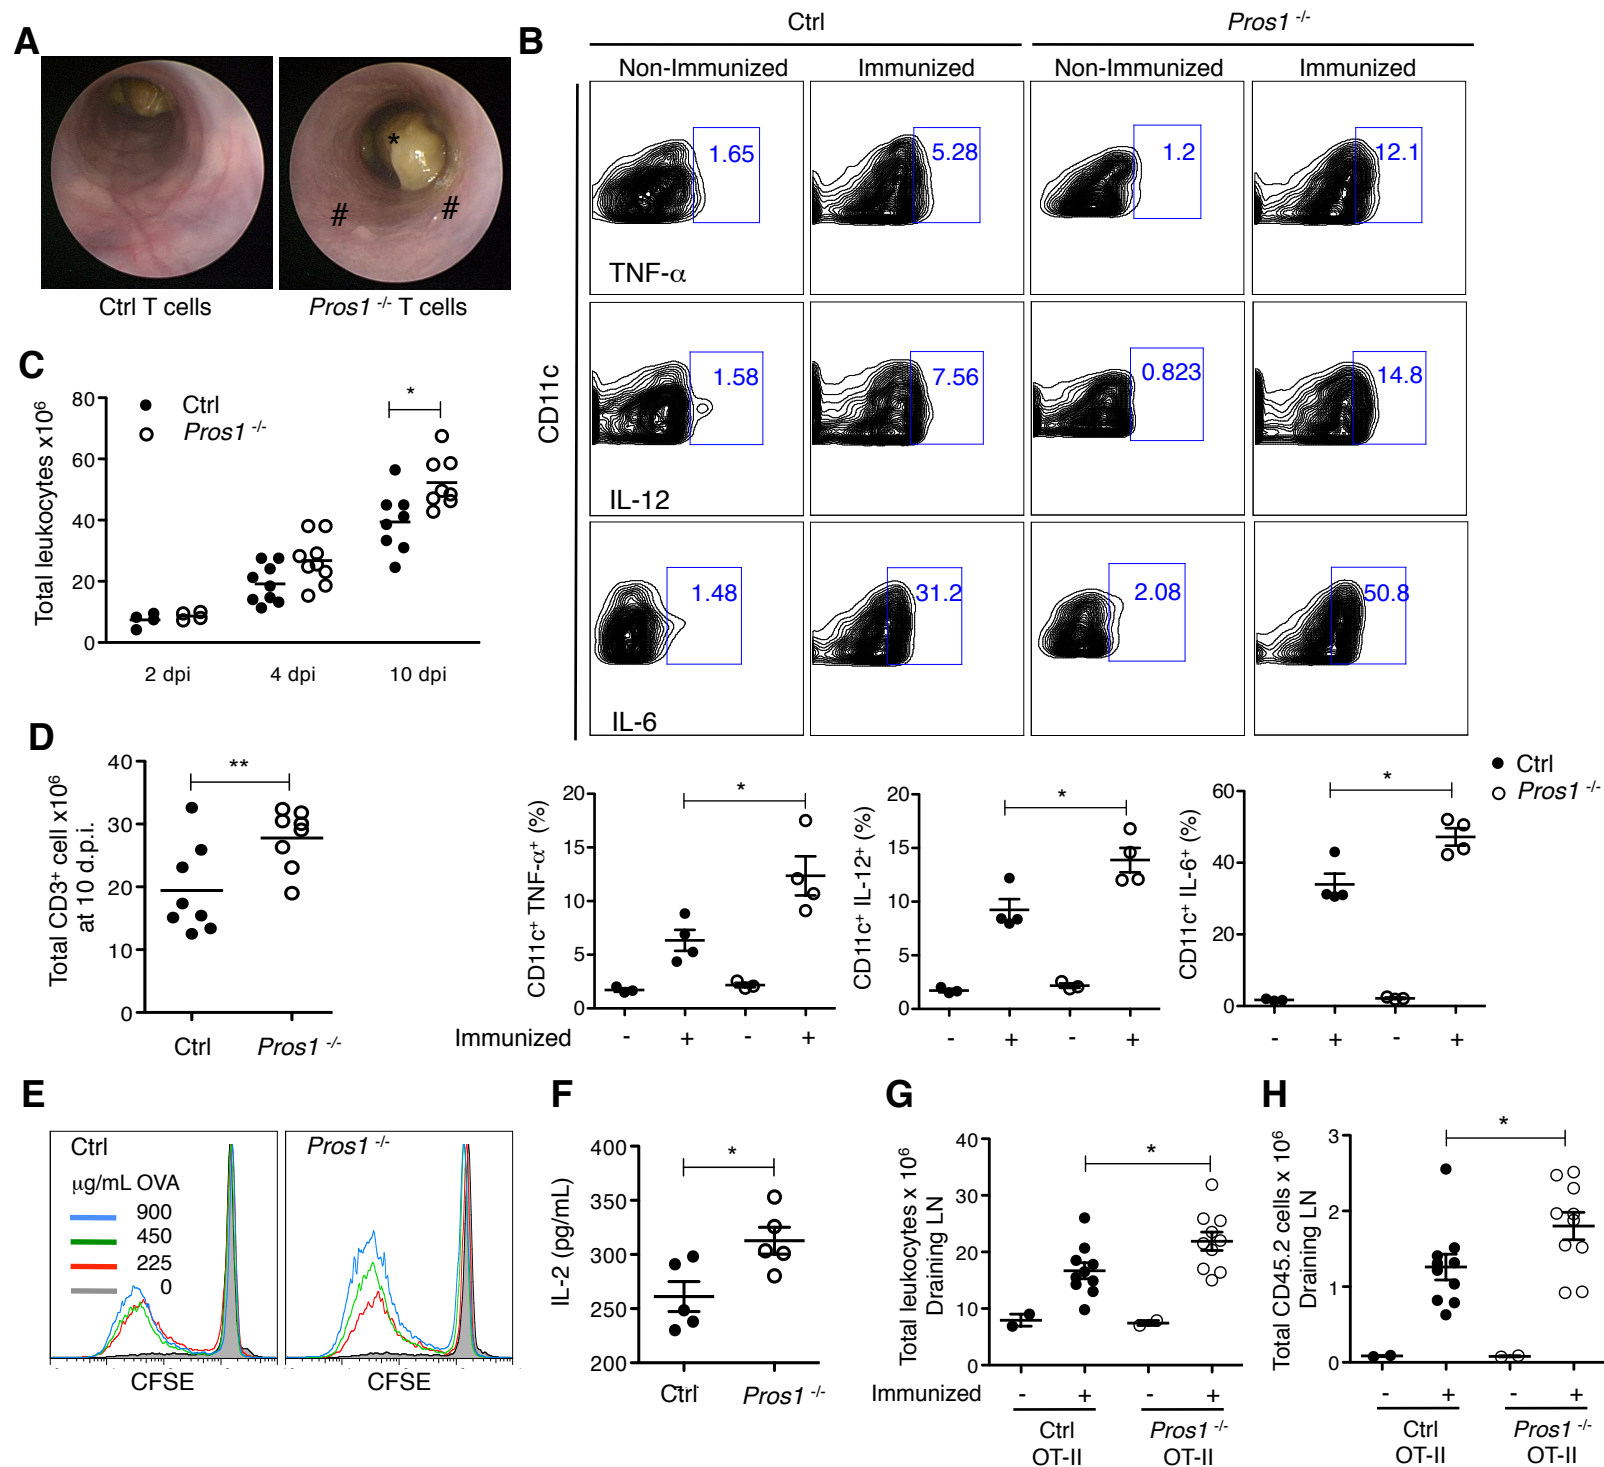

**Figure S2, related to Figure 2 and 3. Deletion of *Pros1* in T cell results in increased colitis and immune responses upon immunization.** (A) Representative colonoscopy images showing loss of translucency, stool inconsistency (\*), and increased mucosal granularity (#) in the *Rag1*<sup>-/-</sup> recipient of *Pros1*<sup>-/-</sup> T cells or control T cells after 6 weeks. (B) TNF- $\alpha$ <sup>+</sup>, IL-12<sup>+</sup> and IL-6<sup>+</sup> production on CD11c<sup>+</sup> cells prior and 4 d.p.i. Representative FACS plots and independent samples of CD11c<sup>+</sup> cells producing the indicated cytokines are shown. (C) Total leukocyte numbers in the popliteal and inguinal lymph nodes (LN) at the indicated days post OVA/IFA/LPS immunization (d.p.i.) of *Pros1*<sup>flx/flx</sup> *Cd4-Cre* (Ctrl) or *Cre*<sup>+</sup> (*Pros1*<sup>-/-</sup>). (D) Total CD3<sup>+</sup> cells in draining LN. (E) CD4<sup>+</sup> T cell were isolated from draining LN at 10 d.p.i. and OVA-specific CD4<sup>+</sup> T cell responses were measured in presence of irradiated splenocytes by dilution of CFSE after 4 days of co-culture and (F) IL-2 production was measured in the culture supernatant. (G and H) Control or *Pros1*<sup>-/-</sup> CD45.2 OT-II T cells were transferred and mice were subsequently immunized with OVA-LPS-IFA. Absolute numbers of cells in popliteal and inguinal draining LN and total CD45.2<sup>+</sup> cells after 72 h of immunization are graphed. Data are representative of 2 independent experiments with at least 4 samples per group. \*  $p < 0.05$ , \*\* $p < 0.01$ .
