# Supplementary material
Source: PubMed Central journal article supplement (PMC4017237)
Supplement: NIHMS572236-supplement-3.pdf [file NIHMS572236-supplement-3.pdf]

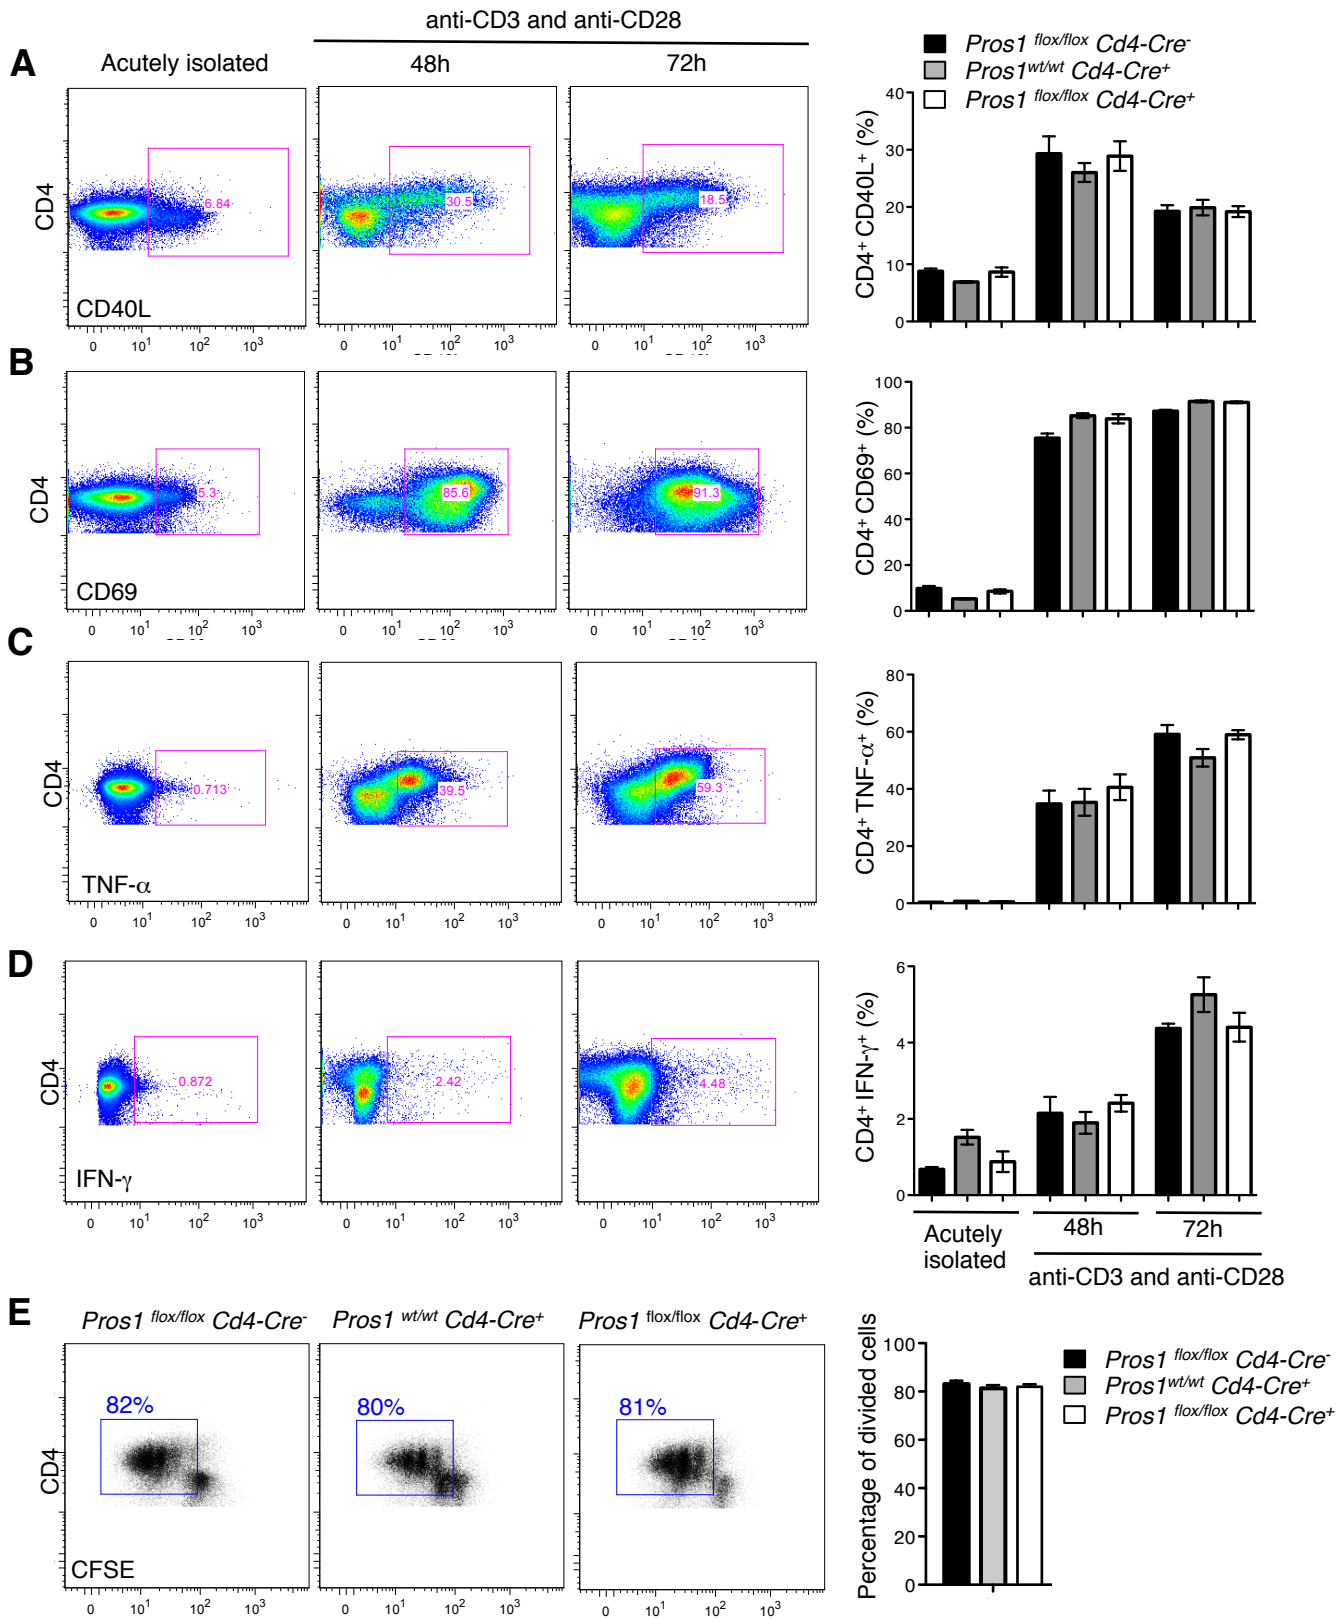

**Figure S3. related to Figure 3. Comparable activation of control and *Pros1*<sup>-/-</sup> T cells upon *in vitro* activation.** CD4<sup>+</sup>CD25<sup>-</sup> T cells from *Pros1*<sup>flox/flox</sup>*Cd4-Cre*<sup>+</sup> or *Cre*<sup>-</sup> or *Pros1*<sup>wt/wt</sup>*Cd4-Cre*<sup>+</sup> were isolated and activated *in vitro* with anti-CD3 and anti-CD28 for 48 and 72 h. CD40L (A), CD69 (B) TNF- $\alpha$  (C), IFN- $\gamma$  (D) and CFSE (E) were measured by FACS. Representative plots from control T cells (left, A-D) and independent data from indicated genotypes (right) are shown.
