# Supplementary material
Source: PubMed Central journal article supplement (PMC4017237)
Supplement: NIHMS572236-supplement-4.pdf [file NIHMS572236-supplement-4.pdf]

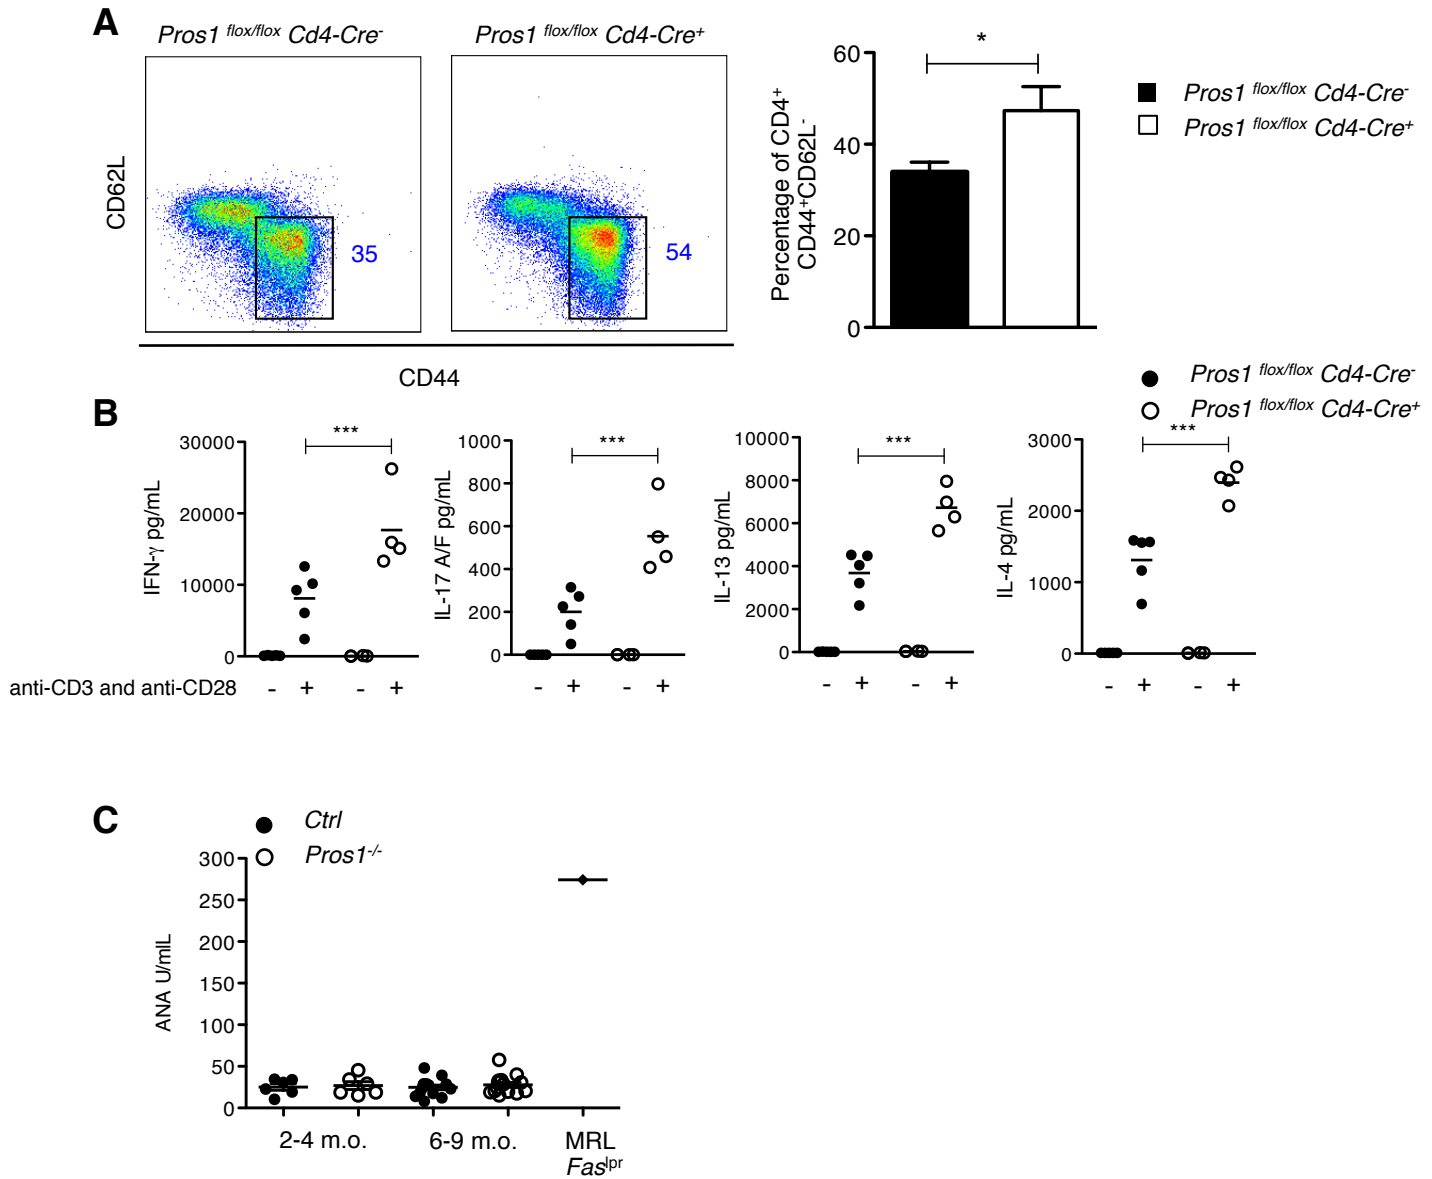

**Figure S4, related to Figure 4. Increased T effector/memory like cells and cytokine production but lack of autoantibodies in aged *Pros1* T cell deficient mice** (A) Expansion of splenic activated/memory T cell compartment (CD3<sup>+</sup>CD4<sup>+</sup>CD44<sup>+</sup>CD62L<sup>-</sup>) in *Pros1<sup>flox/flox</sup>Cd4-Cre<sup>+</sup>* mice in comparison to *Pros1<sup>flox/flox</sup>Cd4-Cre<sup>-</sup>* counterpart, at 8 month of age. (B) Total CD4<sup>+</sup> T cell were isolated by negative selection and *in-vitro* stimulated with anti-CD3 and anti-CD28 for 48hs. IFN- $\gamma$ , IL-17A/F, IL-13 and IL-4 were measured in the culture supernatant by ELISA. (C) Anti-nuclear antibodies were assayed in plasma samples from the indicated mice between 6-9 months old (m.o.).
