# Supplementary material
Source: PubMed Central journal article supplement (PMC4017237)
Supplement: NIHMS572236-supplement-5.pdf [file NIHMS572236-supplement-5.pdf]

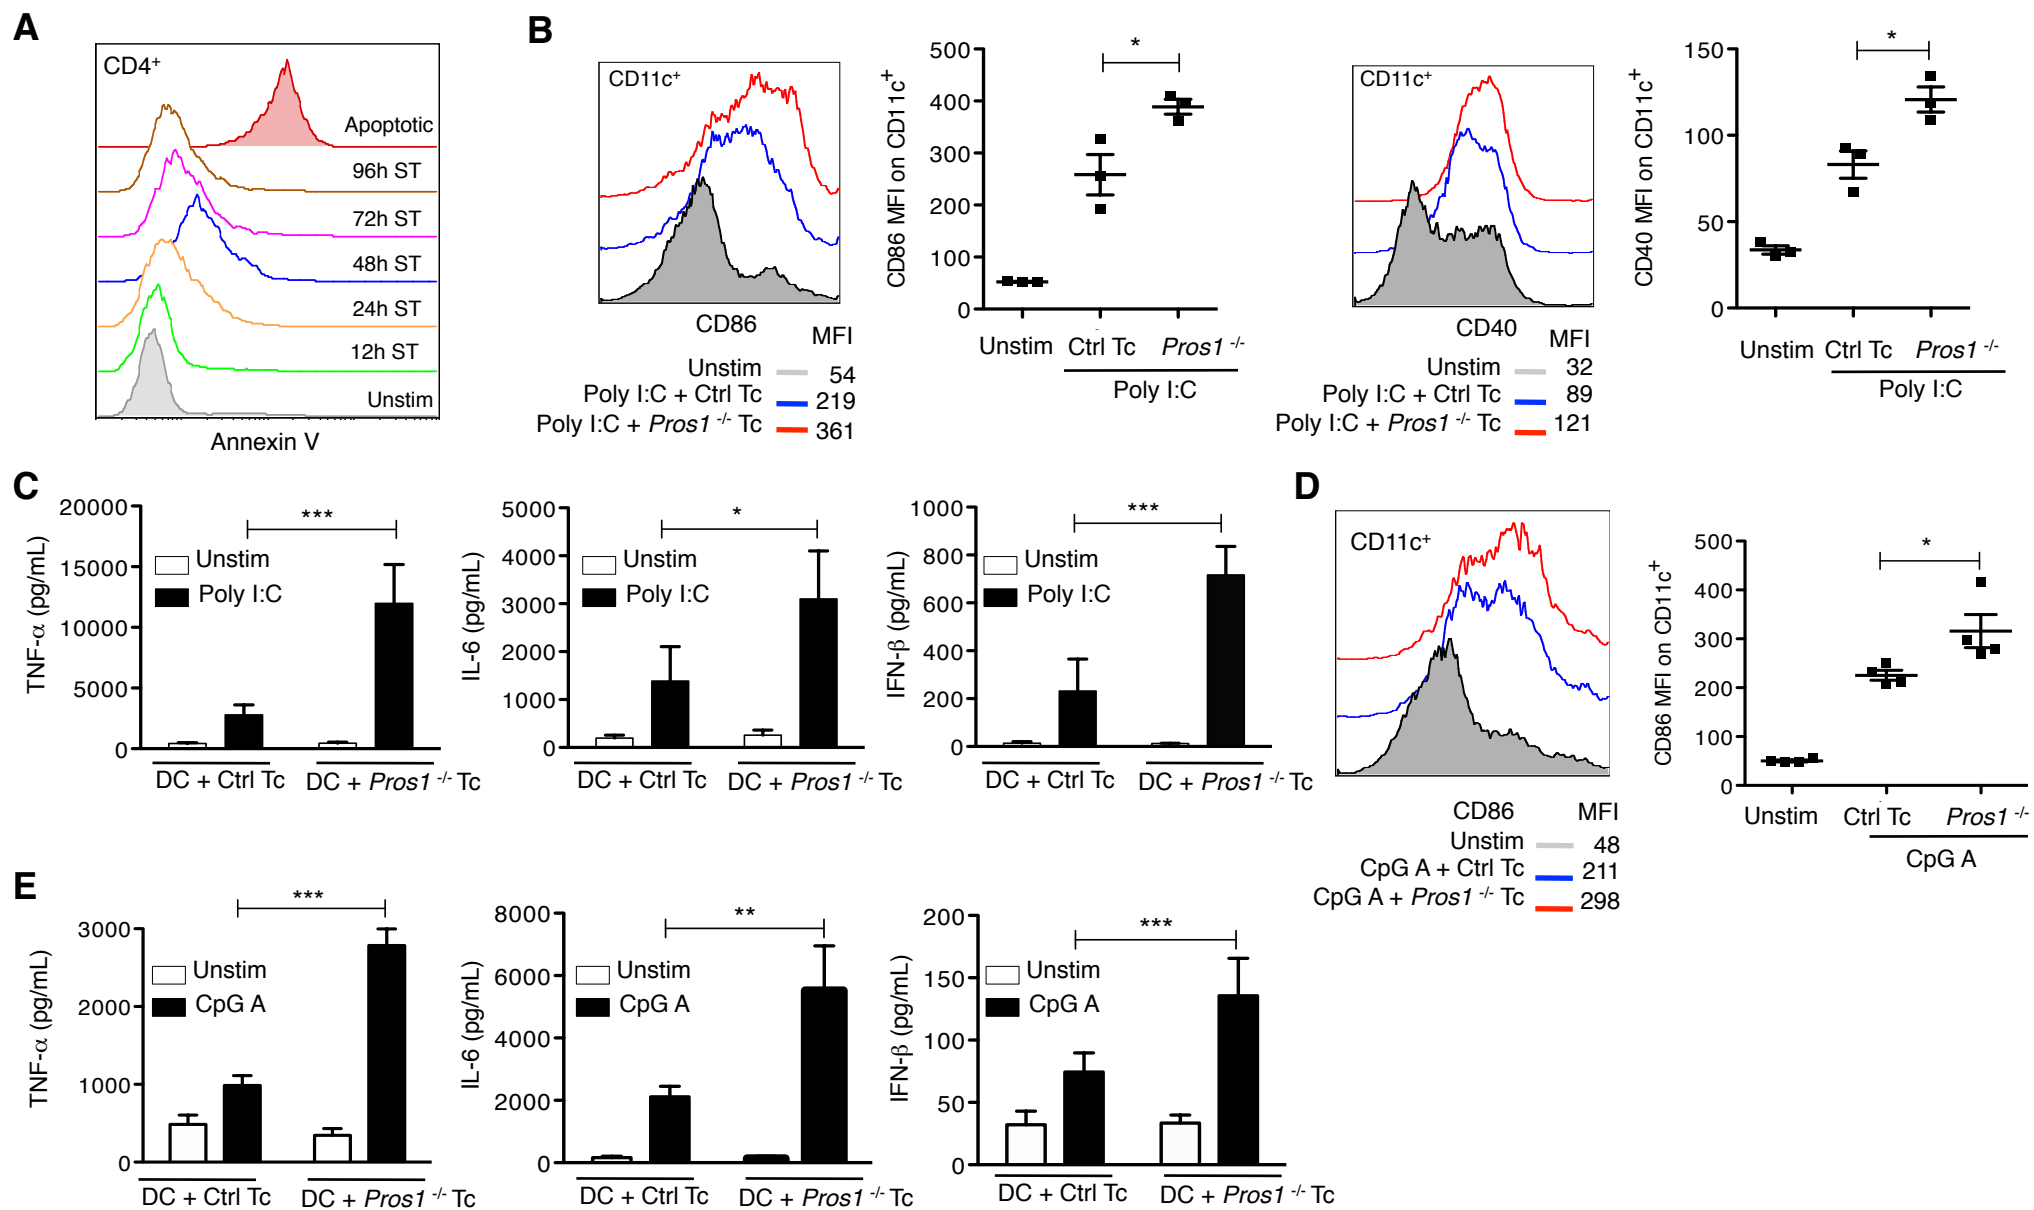

**Figure S5, related to Figure 5. Activated T cells expose PtdSer and express *Pros1* to regulate the activation of BM-DCs.** (A) CD4<sup>+</sup>CD25<sup>-</sup> T cells were activated with anti-CD3 and anti-CD28 (ST) as indicated and PtdSer exposure was measured by FACS with FITC-Annexin V. CD4<sup>+</sup> T cells were rendered apoptotic by treatment with anti-FAS antibody for 12h as a positive control. (B and D) CD4<sup>+</sup>CD25<sup>-</sup> T cells from *Pros1*<sup>fllox/fllox</sup>*Cd4-Cre*<sup>-</sup> (Ctrl Tc) or *Pros1*<sup>fllox/fllox</sup>*Cd4-Cre*<sup>+</sup> (*Pros1*<sup>-/-</sup> Tc) mice were activated *in vitro* with anti-CD3 and anti-CD28 for 4 h and then co-cultured with BM-DCs in presence of Poly IC or CpG A for 15 h. Representative FACS histograms (left) and MFI (right) for the indicated co-stimulatory molecules are shown. (C and E) TNF-α, IL-6 and IFN-β production in the culture supernatant from the indicated conditions, as measured by ELISA. Data are presented as individual samples or mean ± SEM and are representative of 4 experiments with at least 3 independent samples per group. Statistical significance is indicated as \* p<0.05; \*\* p<0.01; \*\*\* p<0.001.
