# Supplementary material
Source: PubMed Central journal article supplement (PMC4017237)
Supplement: NIHMS572236-supplement-6.pdf [file NIHMS572236-supplement-6.pdf]

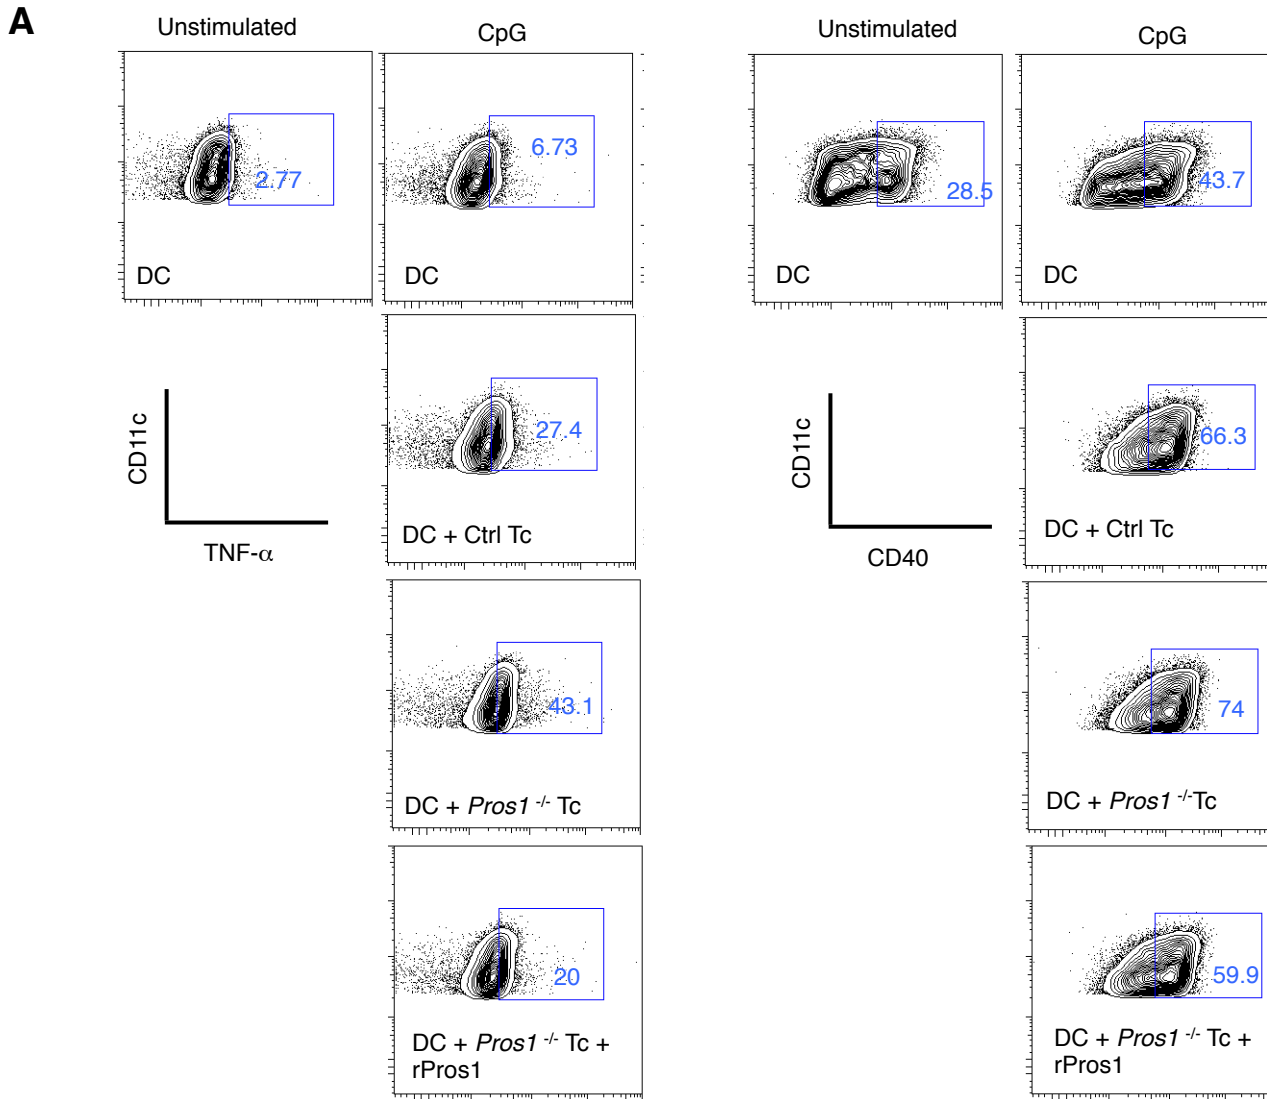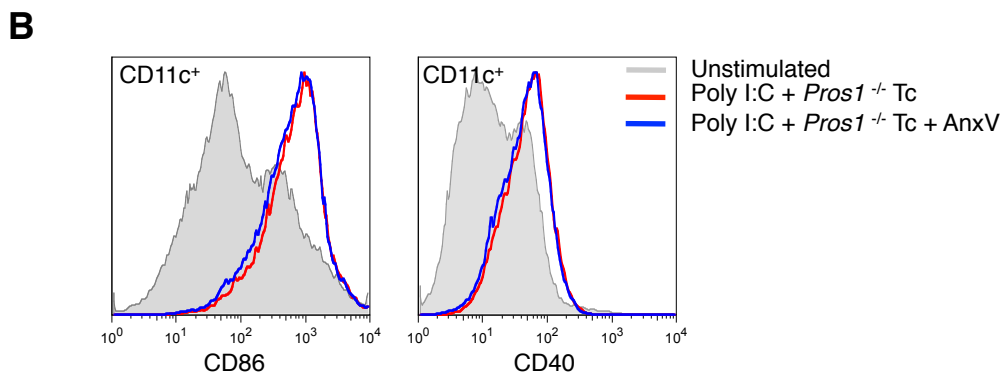

**Figure S6, related to Figure 5. Recombinant murine Pros1 rescues the increased activation of DC co-cultured with *Pros1*<sup>flx/flx</sup>*Cd4-Cre*<sup>+</sup> (*Pros1*<sup>-/-</sup>) CD4 T cells, while Annexin V does not modify DC activation in co-culture with *Pros1*<sup>-/-</sup> T cells. (A) Supernatant from transiently transfected HEK 293 cells expressing murine Pros1 was added to DC/CD4<sup>+</sup>CD25<sup>-</sup> *Pros1*<sup>-/-</sup> T cells co-culture stimulated with 0.5  $\mu$ M of CpG. Supernatant from mock transfected HEK 293 cells was used as control. TNF- $\alpha$  and CD40 expression were measured after overnight incubation. Representative plots for CD11<sup>+</sup>TNF- $\alpha$ <sup>+</sup> and CD11c<sup>+</sup>CD40<sup>+</sup> cells are shown. Data are representative of at least 3 independent experiments. (B) *Pros1*<sup>flx/flx</sup>*Cd4-Cre*<sup>+</sup> (*Pros1*<sup>-/-</sup>) CD4<sup>+</sup>CD25<sup>-</sup> T cells were pre-activated (anti-CD3 and anti-CD28) and co-cultured overnight with BMDCs in presence of 10  $\mu$ g/mL of recombinant Annexin V and 30  $\mu$ g/mL of Poly I:C. Representative histograms for CD86 and CD40 on CD11c<sup>+</sup> cells are shown.**
